# Supplementary material for: Microreactor assisted soft lithography of nanostructured antimony sulfide thin film patterns: nucleation, growth and application in solid state batteries
Source: Royal Society of Chemistry journal article supplement (doi:10.1039/d4ya00436a), 2024-01-01
Supplement: d4ya00436a1.pdf [file d4ya00436a1.pdf]

**Microreactor Assisted Soft Lithography of Nanostructured Antimony Sulfide Thin Film Patterns: Nucleation, Growth and Application in Solid State Batteries**

Bryan Chun<sup>a</sup>, V. Vinay K. Doddapaneni<sup>b</sup>, Marcos Lucero<sup>b</sup>, Changqing Pan<sup>b</sup>, Zhongwei Gao<sup>b</sup>, Zhenxing Feng<sup>b</sup>, Rajiv Malhotra<sup>c</sup> and Chih-hung Chang<sup>\*b</sup>

*a) School of Mechanical, Industrial and Manufacturing Engineering, Oregon State University, Corvallis, OR, USA 97331.*

*b) School of Chemical, Biological and Environmental Engineering, Oregon State University, Corvallis, OR, USA 97331.  
Email: chih-hung.chang@oregonstate.edu*

*c) Department of Mechanical & Aerospace Engineering, Rutgers University, Piscataway, NJ, USA 08854.*

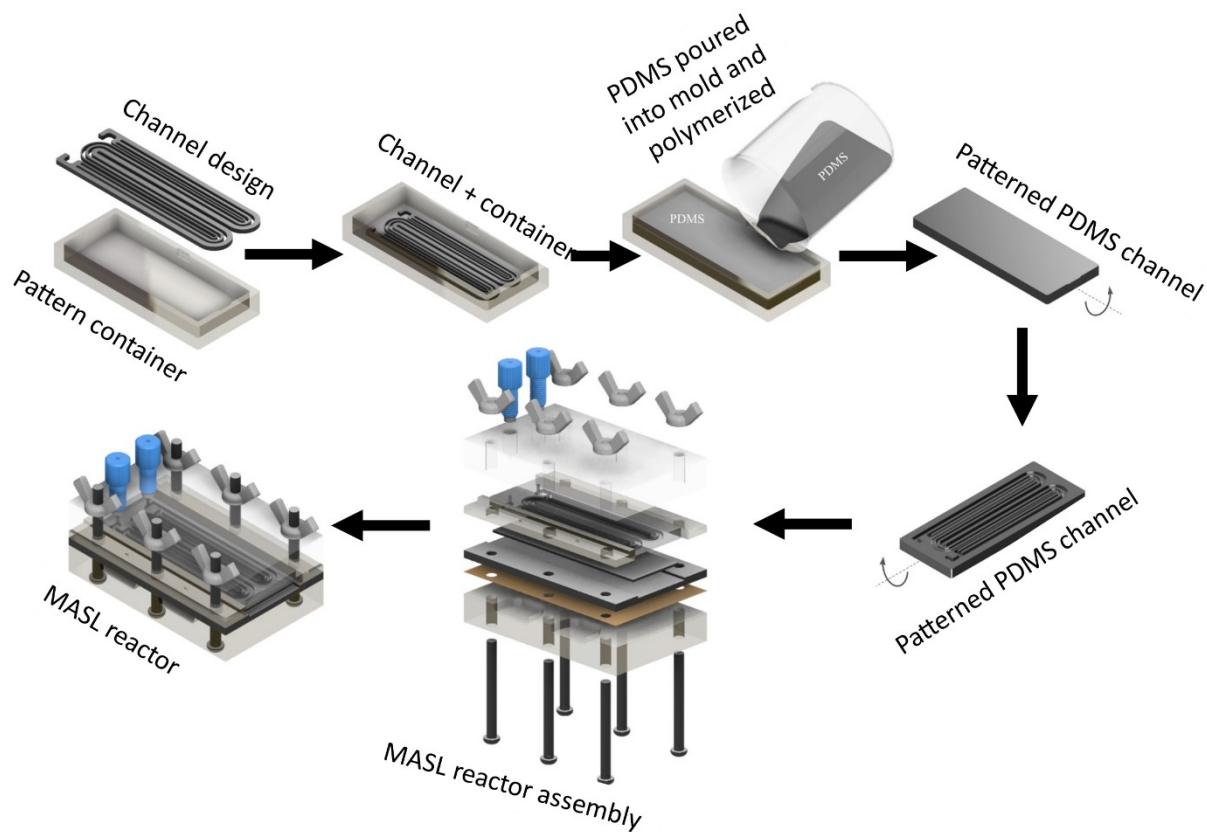

**Fig S 1** Process schematics for fabricating MASL reactor assembly.

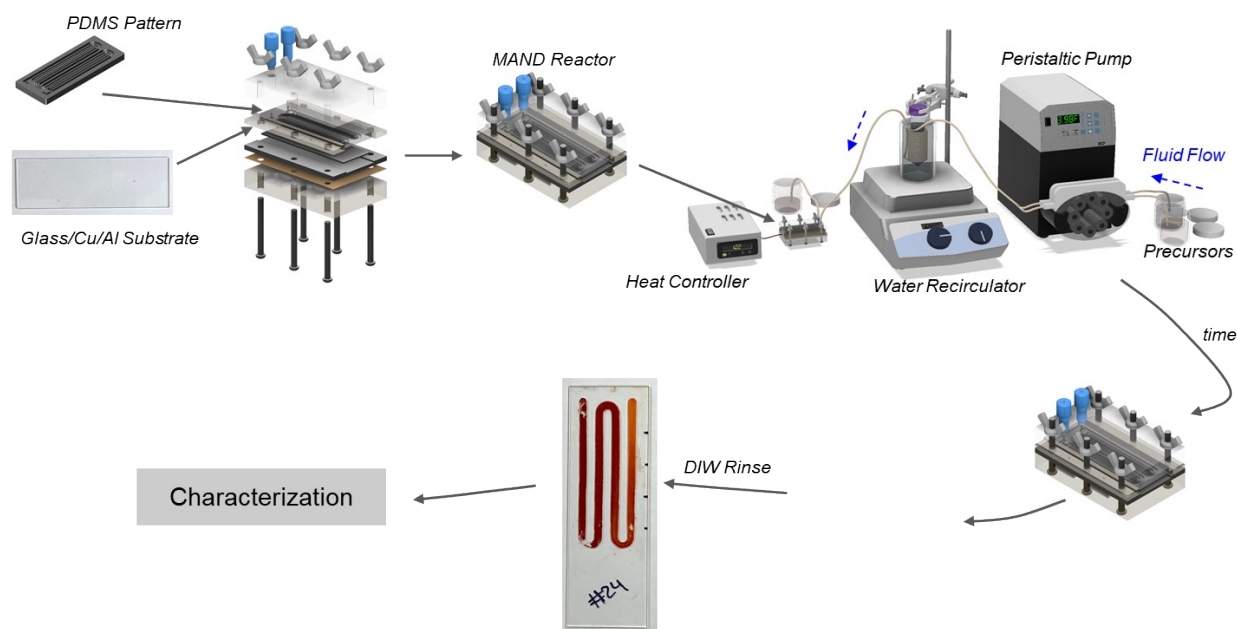

**Fig S. 2** Schematics of the MASL fabrication process.

Fig S 3 shows the COMSOL predicted thermodynamic properties of the water bath on the solution as a function of bath temperature,  $T_{\text{bath}}$  ( $^{\circ}\text{C}$ ), and flow rate,  $Q$  (mL/min). This information was used to design the bath tube length and bath temperature to achieve a target outlet temperature of the reaction solution, given a known flow rate. Similarly, the outlet temperature from a water bath can be predicted based on a known tubing length, bath temperature, and flow rate. All the simulations assumed laminar flow based on the Reynolds number equation, as shown in Equation S2. The equations are defined such that  $w$  is the width of the channel,  $h$  is the height of the channel,  $\rho$  is the fluid density,  $V$  is the fluid velocity,  $D$  is the hydraulic diameter, and  $\mu$  is the fluid dynamic viscosity. A table of all the different pattern dimensions and resulting values is presented in Table S1.

$$D = \frac{4wh}{2w + 2h} \quad (\text{S1})$$

$$Re = \frac{\rho VD}{\mu} \quad (\text{S2})$$

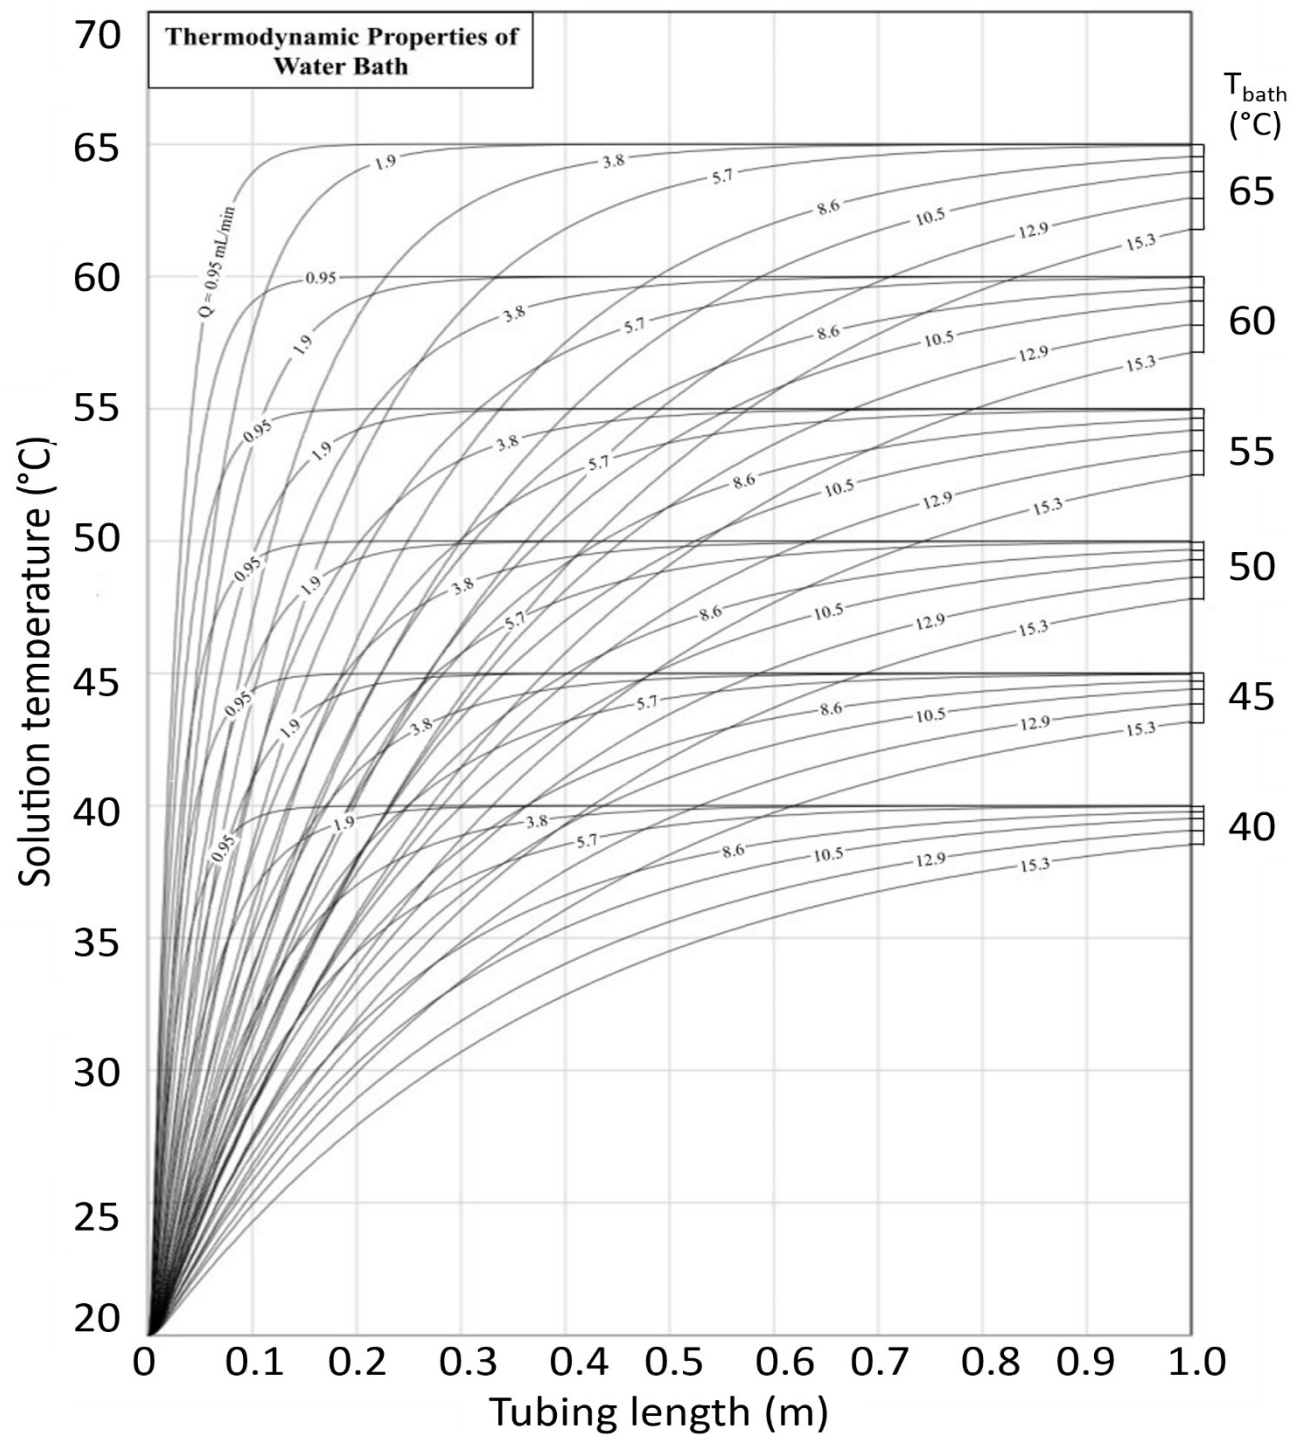

Fig S 3 COMSOL simulated reference chart for outlet solution temperature as a function of bath temperature, tubing length, and flow rate.

Table S 1. Reynolds number calculations for all pattern dimensions

| Pat. ID | w (mm) | h (mm) | Density (g/mm <sup>3</sup> ) | Velocity (mm/s) | D (mm) | $\mu$ (g/mm-s) | $R_e$  |
|---------|--------|--------|------------------------------|-----------------|--------|----------------|--------|
| Growth  | 2.5    | 1      | 0.000786                     | 30              | 1.429  | 0.002381       | 14.148 |
| Growth  | 2.5    | 1      | 0.000786                     | 80              | 1.429  | 0.002381       | 37.727 |
| Optical | 2.5    | 0.75   | 0.000786                     | 30              | 1.154  | 0.002381       | 11.427 |
| Optical | 2.5    | 0.75   | 0.000786                     | 80              | 1.154  | 0.002381       | 30.472 |
| Optical | 1      | 0.4    | 0.000786                     | 30              | 0.571  | 0.002381       | 5.659  |
| Optical | 1      | 0.4    | 0.000786                     | 80              | 0.571  | 0.002381       | 15.091 |
| Optical | 13     | 0.5    | 0.000786                     | 30              | 0.963  | 0.002381       | 9.537  |
| Optical | 13     | 0.5    | 0.000786                     | 80              | 0.963  | 0.002381       | 25.431 |
| Coin    | 2.5    | 0.5    | 0.000786                     | 30              | 0.833  | 0.002381       | 8.253  |
| Coin    | 2.5    | 0.5    | 0.000786                     | 80              | 0.833  | 0.002381       | 22.008 |
| Coin    | 10     | 0.5    | 0.000786                     | 30              | 0.952  | 0.002381       | 9.432  |
| Coin    | 10     | 0.5    | 0.000786                     | 80              | 0.952  | 0.002381       | 25.151 |

### Crystal Structure

The XRD results in Fig S. 4 are from a copper foil substrate sample at a temperature of 80 °C, flow rate of 2.5mL/min, and deposition time of 15 minutes. The sample was annealed at 300 °C for 60 min in the atmosphere. The annealed samples show intensity peaks that overlap with the expected hkl planes for orthorhombic Sb<sub>2</sub>S<sub>3</sub>, CuS, and respective oxides.

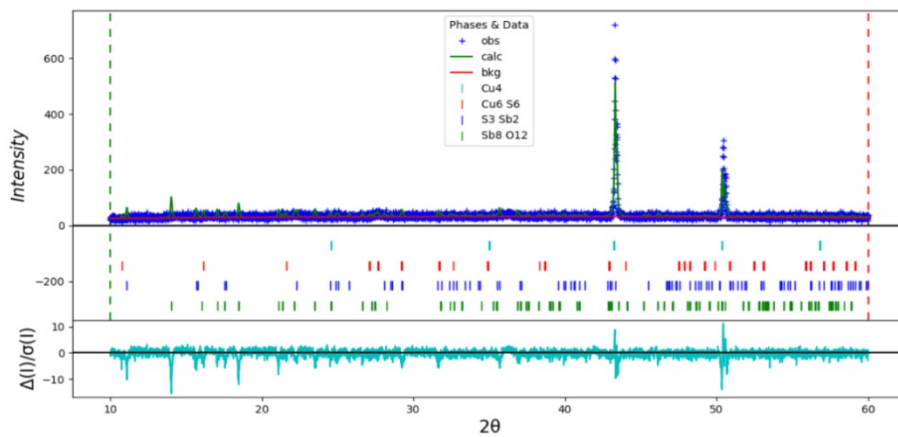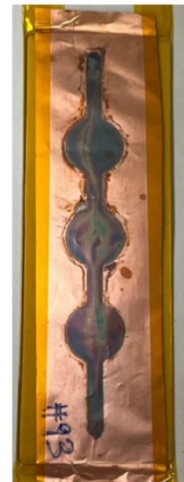

Fig S 4. XRD scan of annealed Sb<sub>2</sub>S<sub>3</sub> thin films at 300 °C for 60min on Cu substrate.

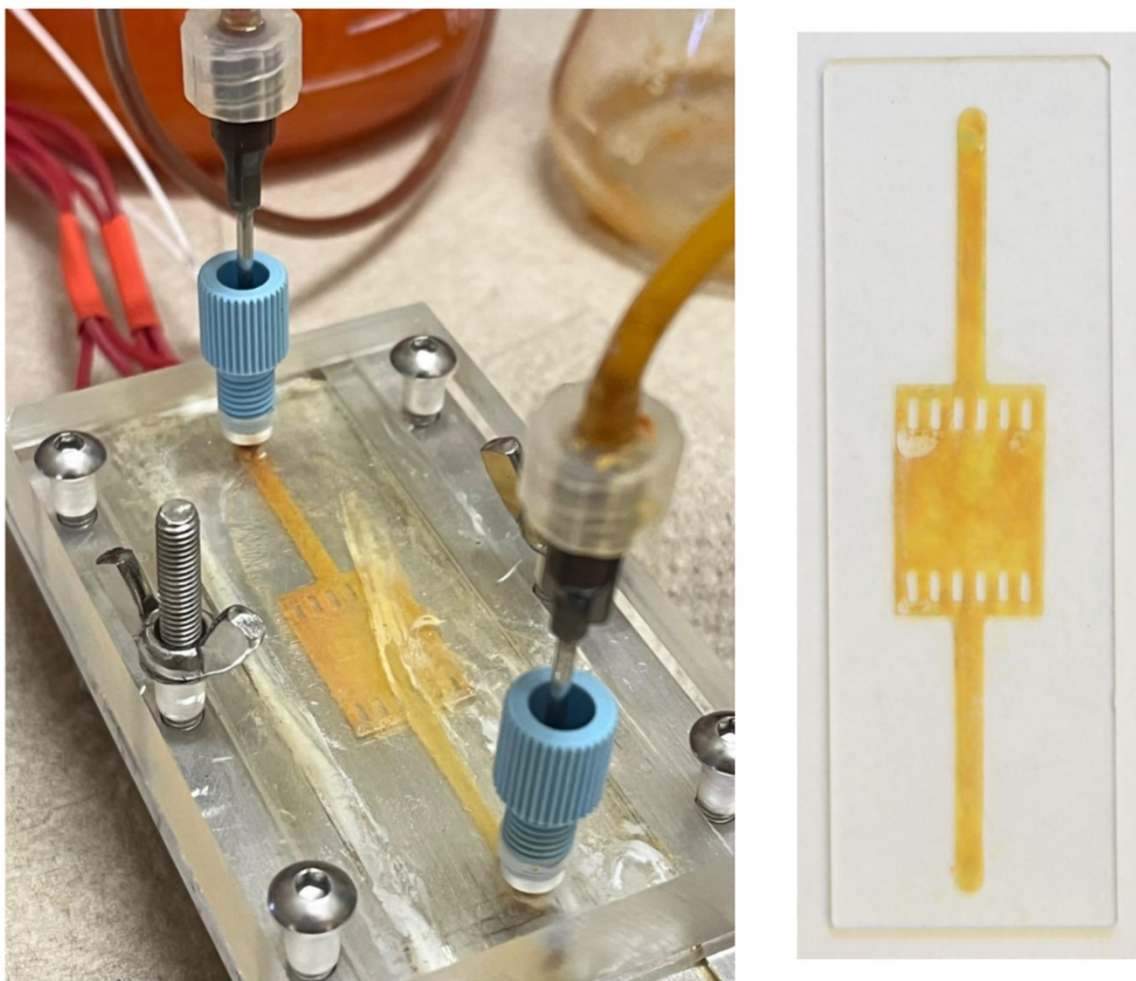

**Fig S 5.** Optical properties samples. view of MAND reactor creating optical sample (left), example sample of optical pattern (right)

(a)

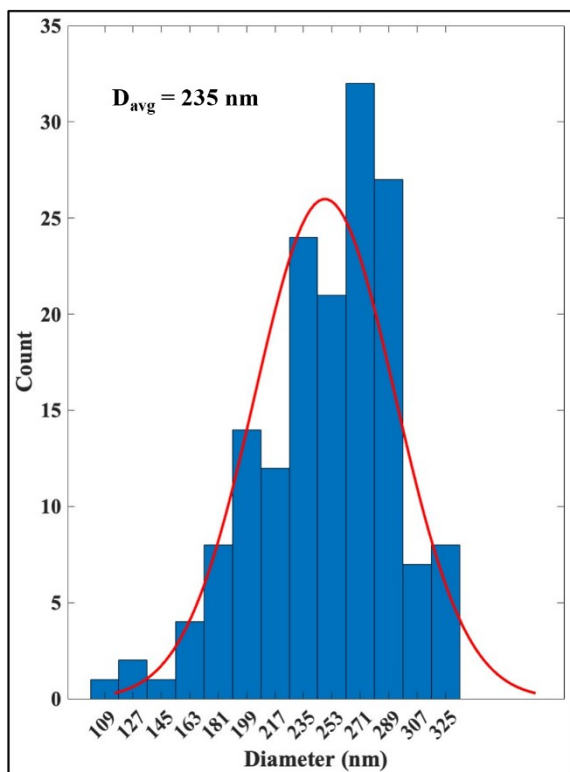

| Element | Wt%   | At%   |
|---------|-------|-------|
| SK      | 34.63 | 66.79 |
| SbL     | 65.37 | 33.21 |

(b)

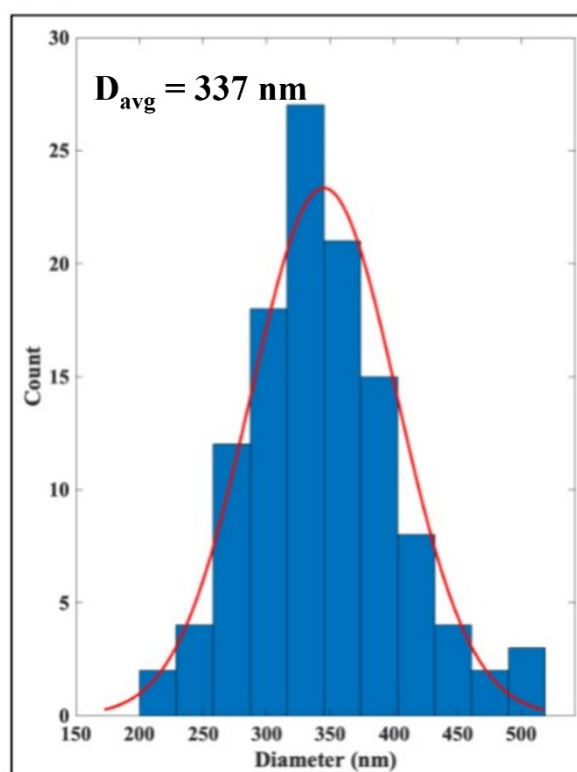

| Element | Wt%   | At%   |
|---------|-------|-------|
| SK      | 44.36 | 75.17 |
| SbL     | 55.64 | 24.83 |

Fig S 6 Particle size distribution a) on Al current collector, b) on Cu current collector
